# Supplementary material for: Cobalt Single-Atom Anchored Tubular Graphyne for Electrocatalytic CO2 Reduction Reaction
Source: MDPI journal article supplement (doi:10.3390/inorganics14010007), 2025-12-24
Supplement: s1 [file inorganics-4043420-supplementary.pdf › inorganics-4043420-supplementary.pdf]

# Cobalt Single Atom Anchored Tubular Graphyne for Efficient Electrocatalytic CO<sub>2</sub> Reduction Reaction

Shannan Xu<sup>1</sup>, Xiao Tang<sup>2</sup>, Chen Long<sup>1</sup>, Dongqiu Zhao<sup>1,\*</sup>, and Lin Ju<sup>1,\*</sup>

<sup>1</sup>School of Physics and Electric Engineering, Anyang Normal University, Anyang, 455000, China

<sup>2</sup>College of Science, Nanjing Forestry University, Nanjing 210037, China

\* Corresponding authors.

E-mail address: dqzhao@aynu.edu.cn (D. Zhao); julin@aynu.edu.cn (L. Ju)

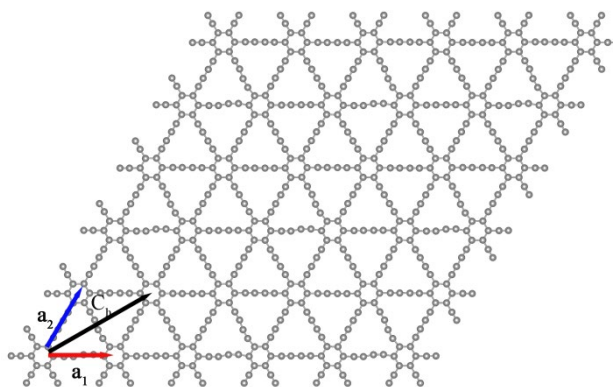

**Figure S1.** The triangular macroporous structure of a graphyne monolayer and its nanotubes. Top view of the graphyne monolayer, showing its anisotropic lattice with the basis vectors  $a_1$  and  $a_2$ . The chiral vector is defined as  $C_h = ma_1 + na_2$  for constructing the nanotubes. The (n, m) nomenclature is applied here, where Armchair-type nanotubes are represented by (n, 0) and Zigzag-type by (n, n).

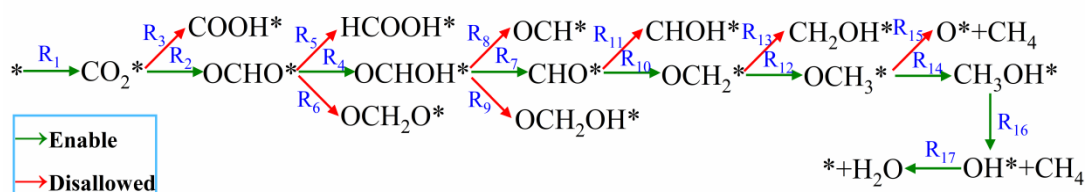

**Figure S2.** The search process for the minimum energy reaction pathways of the CO<sub>2</sub> reduction reactions on Co@GDY-NT. The red arrows denote disallowed reaction paths, while the green arrows stand for the enabled ones.

Elementary steps in CO<sub>2</sub>RR and HER. All the hydrogenation reactions (R1~R17) considered in the search process for the minimum energy reaction pathways of the CO<sub>2</sub> reduction reactions can be written as:

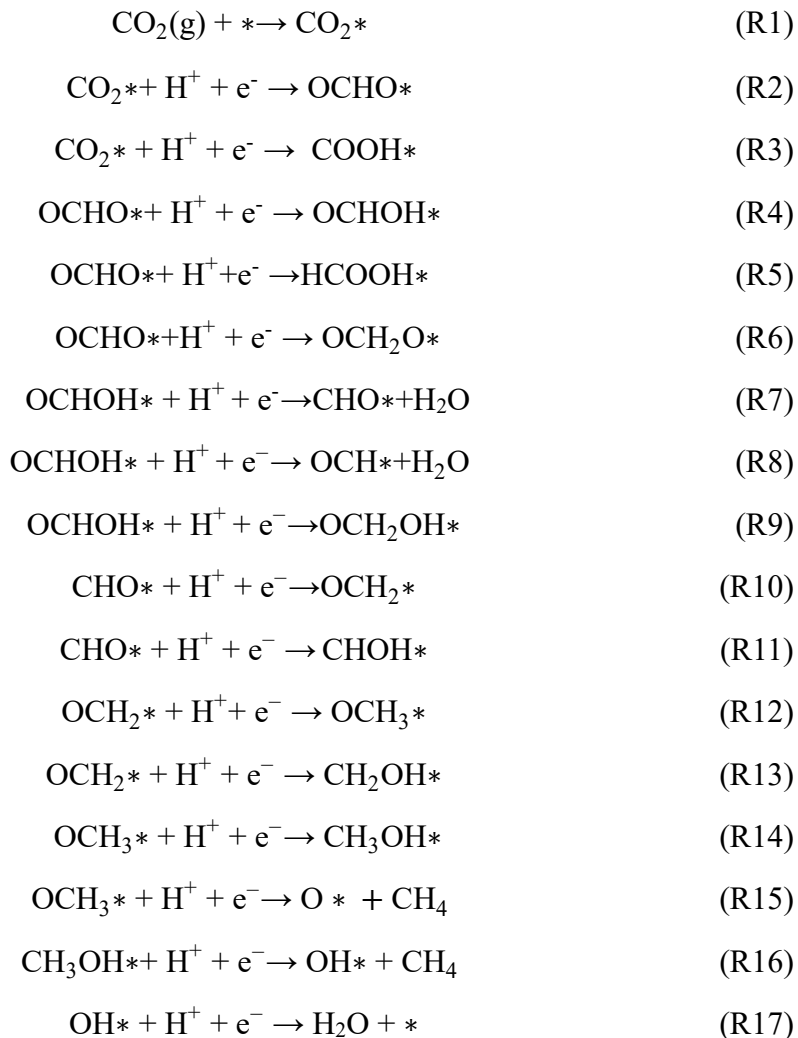

**Table S1** Zero-point energy correction ( $E_{\text{ZPE}}$ ), entropy contribution ( $TS$ ,  $T=298.15$  K), total energy ( $E$ ), and the Gibbs free energy ( $G$ ) of small molecules.

| Species            | $E$ (eV) | $TS$ (eV) | $E_{\text{ZPE}}$ (eV) | $G$ (eV) |
|--------------------|----------|-----------|-----------------------|----------|
| H <sub>2</sub> O   | -471.54  | 0.11      | 0.59                  | -471.06  |
| CO <sub>2</sub>    | -1034.64 | 0.09      | 0.33                  | -1034.40 |
| CH <sub>3</sub> OH | -659.57  | 0.21      | 1.37                  | -658.41  |
| CH <sub>4</sub>    | -221.08  | 0.00      | 1.18                  | -219.90  |

**Table S2** Zero-point energy correction ( $E_{ZPE}$ ), entropy contribution ( $TS$ ,  $T=298.15$  K), total energy ( $E$ ), and the Gibbs free energy ( $G$ ) of adsorbates along the reaction pathway on Co@GDY-NT, where \* represents the adsorption site.

| Species             | $E$ (eV)  | $TS$ (eV) | $E_{ZPE}$ (eV) | $G$ (eV)  |
|---------------------|-----------|-----------|----------------|-----------|
| CO <sub>2</sub> *   | -13057.03 | 0.14      | 0.32           | -13056.85 |
| OCHO*               | -13073.37 | 0.15      | 0.62           | -13072.90 |
| OCHOH*              | -13089.33 | 0.24      | 0.94           | -13088.63 |
| CHO*                | -12633.48 | 0.19      | 0.47           | -12633.20 |
| CH <sub>2</sub> O*  | -12649.63 | 0.13      | 0.78           | -12648.98 |
| CH <sub>3</sub> O*  | -12666.03 | 0.18      | 1.07           | -12665.14 |
| CH <sub>3</sub> OH* | -12682.58 | 0.19      | 1.43           | -12681.34 |
| OH*                 | -12477.83 | 0.10      | 0.35           | -12477.58 |

Therefore, when  $U = 0$  V and  $pH = 0$ ,  $\Delta G$  for each elementary step (R1-R17) can be rewritten as:

$$\Delta G_{R1} = G_{CO_2^*} - G_{CO_2} - G_* \quad (ES1)$$

$$\Delta G_{R2} = G_{OCHO^*} - G_{CO_2^*} - \frac{1}{2} G_{H_2} \quad (ES2)$$

$$\Delta G_{R3} = G_{COOH^*} - G_{CO_2^*} - \frac{1}{2} G_{H_2} \quad (ES3)$$

$$\Delta G_{R4} = G_{OCHOH^*} - G_{OCHO^*} - \frac{1}{2} G_{H_2} \quad (ES4)$$

$$\Delta G_{R5} = G_{HCOOH^*} - G_{OCHO^*} - \frac{1}{2} G_{H_2} \quad (ES5)$$

$$\Delta G_{R6} = G_{OCH_2O^*} - G_{OCHO^*} - \frac{1}{2} G_{H_2} \quad (ES6)$$

$$\Delta G_{R7} = G_{CHO^*} + G_{H_2O} - G_{OCHOH^*} - \frac{1}{2} G_{H_2} \quad (ES7)$$

$$\Delta G_{R8} = G_{OCH^*} + G_{H_2O} - G_{OCHOH^*} - \frac{1}{2} G_{H_2} \quad (ES8)$$

$$\Delta G_{R9} = G_{OCH_2OH^*} - G_{OCHOH^*} - \frac{1}{2} G_{H_2} \quad (ES9)$$

$$\Delta G_{R10} = G_{OCH_2^*} - G_{CHO^*} - \frac{1}{2} G_{H_2} \quad (ES10)$$

$$\Delta G_{R11} = G_{CHOH^*} - G_{CHO^*} - \frac{1}{2} G_{H_2} \quad (ES11)$$

$$\Delta G_{R12} = G_{OCH_3^*} - G_{OCH_2^*} - \frac{1}{2} G_{H_2} \quad (ES12)$$

$$\Delta G_{R13} = G_{CH_2OH^*} - G_{OCH_2^*} - \frac{1}{2} G_{H_2} \quad (ES13)$$

$$\Delta G_{R14} = G_{O*} + G_{CH_4*} - G_{OCH_3*} - \frac{1}{2}G_{H_2} \quad (ES14)$$

$$\Delta G_{R15} = G_{CH_3OH*} - G_{OCH_3*} - \frac{1}{2}G_{H_2} \quad (ES15)$$

$$\Delta G_{R16} = G_{OH*} - G_{O*} - \frac{1}{2}G_{H_2} \quad (ES16)$$

$$\Delta G_{R17} = G_* + G_{H_2O} - G_{OH*} - \frac{1}{2}G_{H_2} \quad (ES17)$$

The Gibbs free energy of small molecules and the adsorbates on the Co@GDY-NT catalysts along the minimum  $\Delta G$  reaction pathway for CO<sub>2</sub>RR is listed in Table S1 and Table S2.
